# Supplementary material for: Comparing Algorithms That Reconstruct Cell Lineage Trees Utilizing Information on Microsatellite Mutations
Source: PLoS Comput Biol. 2013 Nov 14;9(11):e1003297. doi: 10.1371/journal.pcbi.1003297 (PMC3828138; doi:10.1371/journal.pcbi.1003297)
Supplement: Table S1 — Description of the organisms we used for our research and cell types which were isolated from them. The description contains the name, species, gender, age of the organism, and the cell types which were extracted from it. (XLSX) [file pcbi.1003297.s015.xlsx]

## Sheet: Sheet1
Name	Species	Gender	Age	Cell Types
			(days)	MSC	Oocyte	Cumulus	Lymphocyte	Satellite	Large	Small	Beta	Duct	Spermatogonium	Leukemia	Tcells
								cells	Intestine	Intestine	cells	cells
M1	Mouse	F	278	√	√	√	√
M2	Mouse	F	29	√	√	√	√
M3	Mouse	F	37	√	√	√	√
M4	Mouse	M	330	√				√
M5	Mouse	M	44	√				√
M6	Mouse	M	341						√
M7	Mouse	M	199						√	√
M8	Mouse	M	309				√		√	√	√	√	√
M9	Mouse	M	52						√	√
H1	Human	M	---											√
H2	Human	M	---											√	√
H3	Human	M	---											√	√
H4	Human	M	---											√	√
H5	Human	M	---											√	√
H6	Human	M	---											√	√
H7	Human	M	---											√
