# Supplementary material for: Comparing Algorithms That Reconstruct Cell Lineage Trees Utilizing Information on Microsatellite Mutations
Source: PLoS Comput Biol. 2013 Nov 14;9(11):e1003297. doi: 10.1371/journal.pcbi.1003297 (PMC3828138; doi:10.1371/journal.pcbi.1003297)
Supplement: Table S2 — Mouse (S2.1) and Human (S2.2) microsatellite panel. Description of the microsatellite loci we used in our experiments. The tables contain the loci names, their size and their forward and reverse primers. Loci name (first column): [Organism type][Chromosome]_[Basic unit][number of repeats]_[serial number]. Organism type can be M for mouse or H for human, Chromosome can be a number or the letter X. (XLSX) [file pcbi.1003297.s016.xlsx]

## Sheet: S2.1- Mouse
Name	Size (bp)	Forward primer	Reverse primer
MX_T32_1	111	CCACAGAGCAACTGAAATGAGG	TCCCTCGATGCCACTAGAACAC
MX_A43_1	200	ACAGGGGAAGGGGAAACAACC	GGTTTCCCACTTGTAGAACAGTTTGC
MX_AC30_1	305	TCCTGTTAAGAGACCATCACAGTGG	TCCAAATAGGCATTTGATCACCTC
MX_GA35	400	TTCTGACCACTAGCTACAACACTGCTC	GAGAAGAAAACTGATCTCCCAAAGTCC
MX_AG32_1	137	GGTGACCATTTCTCTGCTTGTTTC	TGTTCTAAAGATCGACTGCACACAG
MX_T38_1	215	CATATTAACCAGGCCCCAGGAC	GAACAAAAGGCCCCTAGAAGATG
MX_TC35_1	318	GCATGACTTGGACAACTGCTTTC	GCTTCTGGGTCAAGGGAATGTG
MX_TC36	412	GGGGAGGATCTTCTGGCTCTG	GGCAAGGCACCACAACATGAG
MX_T34_1	128	TGAAACAACATCTTGCCAATCC	GTTCTTTGAACAACTGGGAAATTATTG
MX_A31_1	212	CAACTGCAGTGGGCTCACCAG	AGCCATGAGTCCCTTTGTGGAG
MX_GA29_1	336	ATCCCCCTTGTTTTTCCCTCTG	TTCGAAGGTTTCAGTCAAATATCAGTC
MX_T42	417	GGCATCCTCGCTATTCCATGAG	CAAATGCTGTGGAATTCACCAATG
MX_A45_1	127	TGCTCAAGTATTCACCAAGACATGC	GGAGAGTGTTTTTCGGGGTTTTC
MX_A32_1	203	ACCCAAAGGGGCAATCTTTTTC	TGGCTACTGAGGTAACCAAATTTCC
M5_T52	327	TGTGTCCCCTGGCATAGCCTAC	TGTTGGGGTGTTGTGATGAACC
M6_AG41	402	GGCTCAGTAAGTAGAGCCCAAGTCTC	CCTGAGTTCAAGGGAGGTTTTG
MX_TC40	144	TGACCCAGAGCCAAATAGCAAG	TGGGAATTGGTTCATGGGAAAG
MX_TC32_1	246	CTTCTTACCTCGCCAGCCTTTC	TGGCTATTTCATGATATGGTTACAGG
MX_T37_1	326	GGCAGGTCCATTCAGTCTCCTC	TTTTAAGGAGGGAGCCCGGAAC
MX_A43_2	409	CATTCATCCAGAAATGGTAGTGCATC	TTTTAAGGAGGGAGCCCGGAAC
M2_AC33	160	GGAGGGTTTTAAATAGGGAATGTGAAG	TGCAAAGTGCCCTTCTTTGACC
MX_A34_1	226	CACCTCATTTCTAGTGAAAGGATTTTG	CCTTCTATGCCAGTTGTGGTAAATG
MX_A31_2	326	CTCCCCCATTGTTTTGAACAGC	GCGACAACCCTGTCTAGGCAAC
MX_A32_2	449	GGGTGCTGGGATTCTGACTTAGG	TGGGATATGTTTTTGGAAGCATGAC
MX_AG30	146	AGCCTTTAGCATGAGCTTTATCAGG	CGCCTGTATTTCTCTTAGTGCCCTATC
MX_TC32_2	223	TGCCAGAGCTGCCTTGTATGAG	CAGCTCCTTTCCATTGACTGCTC
MX_T47_1	315	TCAAATGAAATGCCCCACACTG	CTGTCTGCATTTGGGGAGGTG
MX_CA30	411	ACCCCAATCCCCGAGGAACTAC	CTACGGCTGGGTTGTTTTGAGC
MX_A50	128	GGCATCAGATTCTAAGGTTGTCG	AGGTTGGAAGCCAATGGAAATC
MX_GA29_2	222	GGAAAAGTGAGTGAGCATGTGTGG	AGCTGGCCTGCATACATTCACC
MX_GA30_1	319	TTCCCCAAGAAGATTCCACTGC	GCCCATACCTTGATCTCCCTCTG
MX_T34_2	407	CGGCAATTGATGCTCTGAATG	CTCCCCCTGCTCCTTCATACAC
M5_T50	150	CTCCATGGAAACAGCAATGAGC	AAAGCTGCTGCCAAAGATAGGC
M2_T47	256	TGGGACTTCAGGTTTTCATGGTC	CATCTCCCCAAATCCACAGGTC
M1_T49	344	TCACCATGGATCCTTTGTCTCAG	GGAGAATTATTGGGGAAGTTGAGG
M4_AG33	437	GAATAGCATCACCGCACTGCAC	AGAGGTCCGTTGCATCTGTTGG
MX_A46	149	GCCATCTAAAGAAATGTGTGGTTGC	GTTTAGGCCTGGACTGGGACAG
MX_TC35_2	247	CGCAGCCCTGCACATTCTATAAC	TCCACTCTGATTGCCTCCAGTTC
MX_AC30_2	331	CACCTGGCCATAATTTCCATACC	TTCTCATCTTCCGTGGCTTGTG
MX_GA36_1	403	TCAGAGGAGATGAGGGAGAAGAAAG	GGGAAAAAGCAAGGAAATGCTC
MX_GA32_1	149	GCCTGCTCTTAAAATGCCATGATAC	TCTCCAGAGGGGGCATACAAAG
MX_T37_2	244	CAGTGGCCAAAAATTGTTCCTG	GTGCTAGTGAGGCGAAGGGAAG
MX_AG33	348	TGCATTATTGAGCAGCACTTCTGAG	GGTTGCTTCATGCCAAGTTCG
MX_GT29	417	TGTATAGCTAGAGAGGAAACTGGATGG	GCACACAGAAGACTCCCCACAG
MX_GA33	143	GGACCTCTTGGTATGCCCACTG	GAAGAATTTCCCACCTCTAGTCAAGG
MX_TA29	220	TGATGGCACATCACAAGCAATG	CCAGAATGAGGGTGTAGCATGG
MX_AC34	320	GAACATGGGCCTCACCTTTCAC	AGCCTGAGCATTCTCTGCCTTC
MX_T39_1	411	TGGTAGGATTCCAAGTTGGCAAAG	CAGATCACTGCTTCCCAGCTTTAG
MX_TC38	153	CAGCCCAATTCCCCACAGAAC	GCAATTTGAAAAATGATCGAGACG
MX_TC30_1	256	TTGCTATGTGGGTGAAGATAGAAGC	CACAGGCATGGTAATAGGATCAGG
MX_T61	356	CATGCAAGCCAGCCTATGTTTG	TGTGTCATCAGATAATGCAATGAGG
MX_GA29_3	443	ACTGCAAATCACCAAGGAGAGG	AATCAAGGGTTCCAAAGCATGG
MX_T43	153	TGGAGCATGTGACCTCCAGAAG	TCCCCCTCTGGAGAATTGTGAC
M7_A47_1	232	TGCATGTGAAATTTATTTTGAAACTGG	TGTTGTGTTGTGTTTTTGGTTTTGG
MX_CT39	334	CCAGGCCAGGCATGAATACTG	GCAGGTGCATCAAAAATCAAAGG
MX_A47_1	416	TTCACAAGAGTATGCAGGACATTGC	GTTAGTGGGCTCCCTCCCTCTC
MX_A39_1	151	TCACAGAAAAGCTTCTTGGTTAGGC	ACCATTTAGTGGTTTGAAGAAGAAGG
MX_GA30_2	235	CCCCTGTATTCATACCTGCATTCC	GGCCGGTCTGTTTAATAAGCTATTTTG
MX_TG30	354	GGGCAGAAAACAAGGTTTGGAG	GGACATCTCTGATCACCATCTGAAG
M7_CT47	160	TTCTGATCCGGATGGATTCGAG	GACAATGGGCGCCTCTCCTG
MX_AG32_2	250	TTTCACCTTGGTCCAAACCAATAG	CAAACAAGAAGCTGGCCATTTACAG
MX_CT30	335	GCTGGGAAATCTATGGCAACTG	GGTTTCTGGAACAGCAGGAAGC
MX_TC35_3	424	TCCATCATAAACAACAGCAATCTCC	TGGGCTCAATATCATTTTTCAAGC
MX_AG36	160	AGGGAGCCCCCTTCTTTTCC	CCCACTCCACGTGCATTAACTC
M1_AG42	243	GCAGGAAGCAAAAATAGCAATGAG	TGCATTGAAAGATCACATTCAGG
M7_A47_2	314	CGCTGAGGATATTGTGGTCAGG	TCAGGGGTGGGTAATTTTTGTTTG
MX_TG33	450	AAACAGAGCTGGGTGCTGGAAC	TCCATGGGATGCTCAGAAACAG
MX_A47_2	155	GGCCCTCCTTCTGTACTCTCTCC	TTTGGAGACTTGCCAGAATTGG
MX_T33_1	231	CACCCATGAAGGGGACAATGAC	AAACCTGCCACAGGGAATATGG
MX_TC33_1	354	AAGCAAGAGCACATCCCCTGAG	CTCCGAAAGCCGCTTCCTACTC
MX_T32_2	430	GATGCAAATGTGACCTGGTTTAGC	GCACATAATCCAAAGAAGCCACAAG
M5_T45	159	TGCAAAAGAAAAGAAATGGCTCAC	GCTTGCAATGGCTTGTGATCTG
M1_T51_1	225	CCAGTCTAGGAAGGCCTGTCTATTTAC	CTCCAAACGATGGGTGTGAGTG
M1_AG41	449	TTGCTGAAGCACTGGAGAAGTAGG	GCTTTTCCTACTGGCAAAGGGAAC
M4_A45	156	GCACCAAGGGATGCTTTTCATC	TGAAATAACAAAGGCCAAAGCACAG
M6_AAG36	250	TCCAGCCTTCAGTAGGCACAGG	GGACAACTACCACAAAATTCCAAGG
M3_T40	354	TTTTATTCCAGCCTCAACCTCATAAAC	GGGCAGCTCACCTCCTATTGTG
M4_A39	448	TCCTACAGTACCTCTCTGTCCTGAGC	TGGCCGAAGCTTCAGAATTACC
MX_A53	160	CCGAGGATCTTTCCTCGTTTATTG	TTCATGCTGTCCCAGACCAGTG
MX_A34_2	258	GTGCTCATATGGACAGTGCCATTC	GGTGGAGAAGGCTTATTCATAGAAGAG
M2_A49	344	TGGGCTTTTTGGAGAATGATCTG	GCTGTAAGCCCCTGGTTTGATG
MX_TC34_1	447	TTTTCCCAACCTCTCAAACTGC	AGAAGTGGGGTGAGGGGGATAG
MX_A59	160	TGGGGAGGACAAAAAGTTTAGATGAG	TTTCCTTCAACCTGCAACATCC
MX_TC31	254	TTGATGGGGATTTTACCCTTGC	GAAAGATCCAGTGAATGAGAATCAGG
MX_T46	358	TGTCCTGTGGCACCAAGTATCTTC	GGAAAGGGAGAGGAGGAACAAGAG
MX_A35_1	439	GGGTGAACCAAATCAAACACAGG	TGGCAGCTGGAGAGAAAGATGG
MX_T37_3	158	TCTGCCAGAATAATTTGCTCATTCC	CCCACAAACAGCAAGAAACCTG
M6_A41	251	TGGAGTTGTTGATTACGTGCTCTTG	TGGTAGCTCTGTTAGGGGAAAGGAG
MX_TC30_2	348	CAGCTTGGGGCCATCTTAACTG	GCCAAGTGTCAAAGCTGCTTCC
MX_T35	448	GCTGACGGGAATACAGACCACAC	CCTGTGGCCTTTGCCTTTAATC
MX_T38_2	160	CATGGGAATTTGCCCAGAAAG	TCTTTTTCTTCATTGCCAGCTCAC
M6_T52	245	CAGCCCTGTCCTTCTCCCTCTAC	TGAGCCACTCTGCTCTCCATTG
MX_TC29	339	TGGATTCCGATATTCAACAATACATCC	CCAAATGAGGACTACGGCCAAG
MX_TC34_2	447	CACAGTGTTTTGATGTTATGCCAAG	CCAACCAACCAAAACAAACAAAC
M13_TG32	126	GGGCAGCATCAGCATGGTATC	GAGGACCAGTAGGGCAAACCTG
MX_CT31	211	TGCTCTATGGCCACACTCATGTC	TCATTGCCTTTGGCTCACTGAC
MX_CT23	285	CATGTGAAAGTGGTGTCAACTTGG	CAGTATTTGGTGGCCTTTCATCG
MX_T36	446	TGGCCTTGTCATTTACATCTGC	TTAGAATTGGCAGGCTCACACC
M2_CA18	112	GTGTTCCTAAGGTTGTATTTTGGC	GAAATTTGACAATTGCTAGGTGC
M13_AG32	259	GCCCCTGAATCTTGAACTGGTG	CCCCAAAAGTAGCCAACAGTGG
MX_T37_4	312	GCAAGCAGTTTGAGTCACAAAGG	TCTTTGATAAAGCATTCAGATCTACCC
MX_T41_1	399	TTCTAGTCCATCCAGCCCTTCC	GGGGCGTGCTGTACCTTAATTG
M7_T45	157	TTTCCCACCGATCTTTCATCTG	ATCCTGATGATGGTTGCTTTCC
MX_A34_3	222	CCCCACCCACTATTTTTCTCACC	AATTCTTTTCCTGTCAATTCTTTGTCC
MX_T34_3	301	GGCATCCTCCACTCTGGGAAAC	TCAAACCCCACCCCATAGAGG
MX_GA32_2	140	TCATGACGTCAGAAATGATCTGC	CCCTATGAGGTACATCACCCAAGC
M10_GA51	190	TAGGAAGGCATGGTGCTAGG	TGCAAGTATGTGAACTTTGAGTTTTC
M10_AG45	301	AAAGCCCCAAGAAAAAGAACAC	TGCCTGCAAATTTCATGATGTC
MX_A39_2	130	CATTTCCTGGAGGGTGGTTCAG	TCTGTTTTCCAATCAGGGGTCTC
MX_CA29	221	TCTCCCCAGTTCCCATCTAGAGC	TGCTCTCATTGCCTCTCACACC
MX_A32_3	309	TCTCAACATTCGGGATGAGATAAGG	TCCATCCAAGGTCTCCAAGGTG
MX_A47_3	453	CGGGGACATTCCACGTTAGTTC	GCTTATGGTGGATTCCCTGTGC
M5_T51_1	148	TGCTATGGGGCAGCCTAGAAAC	TGCCTGGAATTCAGACTCACAAAG
M4_T48	255	AGCATTTGCAGTGGAGGCTTTC	GGATGCAGGCAGCTAGGGTATG
M1_T41	438	GATAAACCAAAAATTGGCTGTAATCTG	TCTAGCATGGTAACCCTATAACCTGTG
MX_A35_2	113	GCTGTGTCAGGAACTCAGCTCTC	CAGATGGCCTGTTTGCTGTCTG
M16_AAG43	190	TTCAGTCTCCTCCCATCTGTGC	CGATGTGTTGTGCATTGGTTCC
M3_A41	357	CACAGATCTGGTTGAGTGAATGATTG	CCACAGTGAAAGCAGCTATACTCAGC
M7_T50	426	TTGAAGTGTGGCTTTTGGCATC	TGATCTGGAGTTTGGGAAATCAG
M1_GT15	83	CTGCCATCCACTACTTGGTG	CAAATGATACAGTGGGAAACCCC
M5_A51	216	GCTGTCACTCAATGCAAACATCG	CCAGCAGTGCCATTCTCACAAG
M14_CTTT31	260	GGGCATAAATTGTTTGTCGCTTG	GTGTGACTGCTCGCTTCCCATC
M7_A39	433	TGTCCTCACTCCGTGCTGGTAG	CAGGTCAAAAGAGAGCAAAGACAGG
MX_A39_3	324	CCACACCTGGCAGAAGTATGAGG	AATCCTGCCTTCCAGGTCCTTC
MX_T33_2	155	TTGCTGCTGTAGCTGACACTGAG	CACTAAATTCACTGTCCATTGCTTCTG
MX_A38	440	CAATTGCGGTACCACCACAGTC	CAGAGTTGAATGCCCACACCAG
M1_GT33	351	TCTGGGTTGACGTGTCTCTTGC	AAAAGGGAAGGTGGGAGTGAGG
MX_A43_3	209	TGAGGTGGATATTTCCTATCCATTCC	TTTCATGGCTTTTAGAACGGTTG
MX_T37_5	252	CAGCCAAGGCTAAACTGGAACC	CTCCTTTCCAGCCCCAGCTAAC
M6_GA33	409	CATACAGTGCCCCCTCCCTAAG	AGCTTTCCTGAGGGGCATTCTC
M18_AAG41	330	GCTGGTGGAATTATTTGTGGAAAC	AAGCCGGCTCCTAGTGACTTAC
M3_AAAGC30	378	AGACCAGGCACCACCAGTCAAG	CGTAAAGAACGCAGATAAAGCTTGC
MX_GA36_2	150	CCAGGACAGCTCTATAGCAAATGAATC	TGAGCCCACCACAGGTAGTCAG
MX_T47_2	242	TCCCCCTCTTCTCTCTCTGCTC	TAGGGAGAGGGGATCGCAGAAC
MX_T41_2	342	AAAAGCAGATTCAGCAGGAGCAG	GAGGGCCCAGCAAACCTTACAG
M14_CAGT13	234	TTCCCCACATCGCTGTAAATGG	TGGCCTGAGACAAAAGCCTAGC
MX_TG35	150	TGGGTAGACAAGCTGGCCTGAG	GCTGGGCTGAGTGGAAAGCTAC
MX_T40	259	AAGGGGTTTACTGGCCCCTTC	CAGAGGAGAGTAACATTGGCATTGAG
MX_A36	352	AGAGGAGCTGGAGGGAGGAAAG	CCTCAACAGAATCCTGCCACTTC
MX_TC33_2	156	GGTGCTGTAATCTCCCCAAGTCC	CCCACTTCCCATTTCATGTGTG
MX_AG64	239	CCTTTGTTCTCCTCCCCTTTCC	GAGGGGGAGGCTGGTGACAG
MX_AT31_1	331	GCATGAAAGAAAGATGAGAGTGCTTG	GGTGTTCCTTGTATAACCAAGCTGAAG
MX_AT31_2	340	TGCATAGACCAGGAATTCTGAAAATG	TCATGTGCCCCTGTTTGTTTTC
M1_GT20	131	TTGTGTGTAGTACAGTGTTGGTGG	TGGTTCCTGACATCAATCTCC
MX_A45_2	404	TTCTTTGTCTTAAAGTGGGAATGAGG	TGGCATTTGTGGAGGATATCTGG
MX_T39_2	124	TGCCTACTGCCTTTACATGAGGTC	CCAAGGTGAGATTTCATCCTGAGTC
M13_CT31	211	TGCTCTATGGCCACACTCATGTC	TCATTGCCTTTGGCTCACTGAC
MX_CT29	275	CAGCAAAAACAGGTGGCTGTG	AATGCAGGGCTCAGGAAATGAG
M10_AAGC22	172	TTCAGGTAGATACATCAGACCTGTGG	AAGTCTTGGGGGAACAGTCGAG
M19_GAA19	375	GAGAAACCCTGTCTCGAAAAGAAG	GTCGACGCTGCAACTCAGTC

## Sheet: S2.2 - Human
Name	Size (bp)	Forward primer	Reverse primer
HX_A28_1	320	CATCCTGCATTGCACAGCATATC	GCACAGTGTGGCACAGAAAATG
HX_A28_2	302	TTGCTTAAGAAGGTGGCTTTTGG	TGAGTTAGCTGCCCCTCCTCTG
HX_A28_3	226	GGGCTGTTTTAAATGTGTGCTTTG	AGGTGTAGGGGTGAGCAGAACG
HX_A28_4	304	TCAGGGGAAGAGGAAGGAGGAG	CGCACAGACATAGGGACAATGG
HX_A28_5	353	TGACTTGAACCTGGCATCAAAGG	TTGTAATAACAGGCCAGCAAACATC
HX_A28_6	151	TTGGTGCCAAGGAAGAATCAGG	CCAAATTAGCCCATGAATGTGAGC
HX_A28_7	251	CTCCAAGGCAAGTGAGGGTGAC	GCACTTAGCCCATGGGAACAAC
HX_A28_8	159	CCCCTCCTTGTTTCTTCCATCC	ATGTGGGAAAGGGACTGTGGTG
HX_A28_9	256	CAATTGCTTTTACCTTGTGAGAGAAGC	AGCAAAACCCAACTTTTGGAAAC
HX_A28_10	340	TCCATTCAGGAATCTGAAATATGGTC	AGGCAAATTGTTGAAGGTGTACAAG
HX_A28_11	360	GCAGCACTGTTCTAGGACATTCTTATC	TGCTCACAACCTTGTTGGCATAG
HX_A29_1	202	TGACTCATCACCTCCCAAAAGC	GCCAGCAGCTCCTCCTATTTAATC
HX_A29_2	122	TGGAGGTGGCTTCCTTAAGACC	GGTGAAAATTTGCCACCCATAC
HX_A29_3	212	TGCTGAATGAAAATCAAGACCAGTG	GGAAATGCACCGTGGTAAAAAC
HX_A29_4	300	GCCAATCCTGGTTGCACTTCAG	CTGGGGAGCTGCTTCCAGTC
HX_A29_5	141	GTCAAACCAGAGGGGAAAGTGG	AGAAAGTGGCAGCGTTGAGAGG
HX_A29_6	435	GGTCTTATTTTCACTGCTCTACACAGG	TAAAAGGCAGCTGGATTTGTCG
HX_A29_7	160	TGCATGTGGTTGCTTCAGAGC	GCTCGTATATCTGGGGGAAGCAG
HX_A33_2	438	TCCTACCTTAATGACCAGGTAAAGACG	TCAAACCACTGTTGAAATGAGTGC
HX_A33_3	249	TGGGAGAGAAGTGGGGTAAGTAAGG	TGTCTGTTTCCCCGCTCTTTTC
HX_A56	405	CAGGCCACTGCAGATTAAAAGC	TCCCATGACATTCTGGATAGCAG
HX_AC31	122	TTCCCAGTCCTGGAGTCCTCAC	TCTATGACCCAAACTTGCTCAGG
HX_CA23_1	411	TGACAAGAAACCAAATGAACCCTTAAC	AAATGAAGGACTCGTGTGTGTGTG
HX_T28_1	136	TGCTACCCAGCTGGAGGCTAAG	AAAGCAAGGCACATAGGCACAG
HX_T28_2	318	GAAGATGGAGGCAGGAGAGCAG	CAATGTCCCTGTCTTGCAGTGG
HX_T28_3	417	TGGGTATGAGTGCTACTTTACCACAG	GCTGGTATGAACATTGAGGATTTTG
HX_T28_4	157	GCCACATCAAGCAAACCATAGC	TCATGGAGCATTAAGGAACCACAG
HX_T28_5	359	CTAATGATCTTGAATGGGCATGG	AGGTGACTTTGGCCGATTTCTG
HX_T28_6	242	GGAGACCCAGGCTGTAGGAATG	TCTTTGGATTCTGAACAATTTGGTG
HX_T28_7	443	TGTTTGGTCCAATAAAAGGAAAAGG	TCACTAAGCAAGTCCAATTGAATCAG
HX_T29_1	214	AACACTGATCCAATGCACTCTGC	TGCCCACTTGCTGCACAATAAC
HX_T29_2	239	GGCCTCCACTATCCCTCTGTTG	AGACAAGATCCAAGCCCACAGC
HX_T29_3	330	TTTCTGGCATCCCTTTCTGATATG	TTCCTCACTTGTGAAAGAGCTATGG
HX_T30_1	420	TGAGACTGATGACTGGAAACTCTGG	CCCCTTAACTGCCCCAAAGG
HX_T37_1	438	ACTGGCAAAAGCCAAGGAAATG	GCACAGGATTGAAATGTAAACCGTTAG
HX_T39	418	TCTCATGATATCCTAAAAGCAAACAGG	GCCTGTGACATTGGTGTGACTC
HX_T40_1	401	GGAGAAGAGCAAATCTAGGCACCAG	GGGAACCTGGGTAGGGAGTCAG
HX_TA29	224	CCCCAAAATGGCCTATTTCAATTAC	TGAAAAGCATGCAAACACATGG
HX_TG25_1	123	ATGCTTGTCTGCCTCAGCTTTG	TCAATTAGCAATGCCTCCTCCTC
HX_AC24_1	313	CAAAAGAGGCCATTTCCCTGAG	GCTGATACAGCATTCTGAGGCTTG
HX_AT23_1	314	ACAAATGGCTTTGGGGCAAAC	TGGCACCTGTTACACATTTGTCTTTC
HX_A36_1	319	TCCCTCATATCCAGAAGCCAACTC	CCTAATGTCATGAAAGGCAATAAAATG
HX_A34	320	CCCAAAACAAAATTTTTCTCCAACC	CATCACTCTTCAATGGGAAAACTGC
HX_AC24_2	324	ACCCCCAACAGATCAAATCTCC	TCCTGCAGGTAAGGTCTCTAGGC
HX_A32_1	325	CTTGGTTACCTGCCCAGGATTC	TGGCCCTGAGCTGTTTTTATCC
HX_T46	326	TCCAACATCTAAAGGGTCTGTTGC	GGTGCCTGGAGGTGAGTAGTCG
HX_T53	327	CTTGGTGACTTCCACAGCCAAG	TAGGCAGCAGGGTCTCCAAATG
HX_GT23_1	329	GGGTCAGTGAGAGATGCAGGATG	TGAGCTGTACTTGAGGTGGTGGAG
HX_CA23_2	128	GGATTCAACTCCAAATGTGCAGAG	AGCTTGGAATGGCTTTGTGACC
HX_A36_2	334	TCCCTCAAGCATGAAAGGAAGG	ACGTCCTCCTGAGTTGGAGTGC
HX_TG24_1	336	GCAATTGTGCCAAAATGGATTG	GCCTTGTCCATGAGAAGCATTG
HX_GT27	343	GGTTGGGACACTGGGAAATGAG	CTACCAGGTGGGGACCTGTGAC
HX_T32_1	350	GACCACTTCTTCAAAGAACCTTTTGC	GAACACAAAGCAGCCTCTTAAAATATG
HX_AC23_1	132	GGTGATGGAGACTGTGAAAAGACAG	CCAGTGCTCCATGGATTCAGAC
HX_A35	352	CTCCATCCCCTGGCTACATTTG	CAGCACCTAAATAGGGTGATGACTTC
HX_CA23_3	355	CAGAGGGCAAATTCTTCATCATAGG	TGCCCTTTTTAAATCCAAGGTG
HX_TC29	355	TCTGTCTCCTCTCCTCTCCTTTCC	TGTGTTCCTTTGTTTGCTCATTTG
HX_GT29	355	TGGAAATAACCCACACAAGGAAG	CAATTGTATGTGCATCTATTGCCATC
HX_T31_1	355	TCAATCCCCATCTGATCAAAGC	TGAAACCTTGTAAAATTGTGGCTTACG
HX_TG28	356	CTTGTTCTCGTTTGCGCTTACC	GGCTTAGAATTGAGCGCTTCTTG
HX_AC23_2	357	TTCCCGCAGATGCTATTTGATG	TCCTCCAAAACAGTTGAGGTTTCC
HX_TG24_2	139	GTCCACAGCATTCACCCTGGTC	AAGGGTGGCCCCTTCCTTCC
HX_A30_1	358	TCAAGAACGGTTTCCTAGCTCTGC	TCCCAAAGAGATAAAAGCACACAGC
HX_TG22_1	360	ATCGCATTGCCAAAAGAAGCTG	ATTAATTTGGCTGGCGATGGAC
HX_A38_1	408	GCATGGCAGAAAACTGAGAACC	TGTCACCCTTAATGGAGGACGTG
HX_T31_2	409	AGGGACCTGTGCAAAGGAAAAC	CCAGGCAAGGAATGTTTTCTGG
HX_TG24_3	410	AGCCAAGGGCACCAGGCTATAC	AAACCGACATCAGAAATCAAAACG
HX_GT25_1	139	CACCCACCATGGACCATACTTTG	CACCAACCTAGGCTCTTAAAGTACACG
HX_T33_1	412	GCCCTGGTTCCTGATCACTCTC	GGTTATCTCACAGAACCCATGGTAG
HX_T36	416	TCACTCCACACTAACACCTTAACAGG	AGCTAGTTCAATTTGGATTTCTGTCAC
HX_AC23_3	420	TGGAGGTAGGACACTGCCAAGC	CACTCTGCAGTTAGTCCATTTCAGC
HX_A31_1	423	TCGACTTCTTCCCCATTTCTCC	CCCATTTACATGCTGATGTTGTCC
HX_T37_2	427	CAAGGCTCATATATTTTCCATCACCTG	TCGGTGAGGTAAATGCTTTGTCAG
HX_A37_1	430	TGTCACTGAAGGCACACATCCTG	GGAGGTCATTGACGATGGATTG
HX_A31_2	434	TTCTTGTCATCTTTATCTGCCTTGG	GAGTTTTGTTTTGGTTTTGCGTTAC
HX_A32_2	434	TGCCAGAGATGGAAAGCCAGAG	TTAGGTGCGTGGGTACGAGAGC
HX_T31_3	435	TGTGCACTTTGCTAAGAACATTTATCG	TCCAACCATTCTGGAGGAATCAC
HX_T35_1	436	TTTGCAGGCAGATCTAAATTTGTG	TCACAGGCTTTAGGGAAATTTGATG
HX_T31_4	437	TGTCAATCCAATTCTTACAAAACCAG	TGTTTATTTAAATGGCAGGGTTCC
HX_T32_2	438	TCCTGCTGATTCTTCCCCTAAGC	TGCAGAAGATGCATGAGTGCAG
HX_A33_1	438	CTGGCAAGCCCACTTACACACC	TTCATATTGCAGACGCCAAAGC
HX_AC24_3	439	GACGGGCTTCCCGTAAAATTG	AGAGCGGAGCCATTGTGGAG
HX_T30_2	441	CATCCAGTCTTTCAAGAATTTCAACAC	CACATGATAGCCTTAAAAGTGTTTGC
HX_A42	441	GGTGATGTCTTACAACTCCCCACTC	CCTTTCTAGCCCTGGCTCTTCC
HX_T32_3	442	TGCCTGAGATCATGACGTAGAACC	TGTACATCTAGTGGAGGCAAGCAG
HX_A31_3	447	GGAGAGGCCTGGGAAAGAGC	AGCCTGTGTGAGTGGGTCCTG
HX_GT25_2	141	TTCTGGCTAAAGAACCGTGAAGG	GGCCTAAGCCAGAGAGATTTGG
HX_GT25_3	448	GGTAATAGAGGGAAGCACATGTCCAG	GGCATTGAATCAACTCCTGTGTC
HX_T30_3	448	GCCATAAGGCTGGCTGTATTAACC	CAATGCAAAACCTGGCTTGGAG
HX_T34_1	448	TGGGTTAACATCTCTGGTCTCTGG	GGCTAACTTGGAGGCCAGTGTG
HX_A38_2	448	CCCAGCTGAAAGCATATTGAAGG	TGCTTTCCTTTGTAAATTGTCAAGGTC
HX_TG25_2	450	GCCTCCTGAGTCCCAAACTGTC	GGCTTTTTGATTGTAAGTGCCAAAC
HX_CA25_1	450	TTTGACCAAATTCTAGGTGTAAAAACG	CACAGGGATGCCAAACTAATAGAAAAC
HX_CA28	450	CAGGCTTCAGGCCATTTAAAAC	TGAACGGAAATCCTCCTTTGTTC
HX_T33_2	141	TGCAGAAACAGCTATGCAGTGG	CCCTAAATAACTCCAAAGCCAGTCC
HX_T40_2	450	GAAATGTGGGCTAAATACCCATAACC	CAAGGAAAAATCATGTAAAAGGCAGTG
HX_A37_2	104	TCATAATCTAACCATCACTGACCTTGG	AATTACATTTGGGTGGCTTTGG
HX_GT24	142	CAGAAACAACCTGTCTCAGGCAAC	AAGAAATAGGTGTGGCCCTTGG
HX_TG24_4	142	AACCTCTCTGCCAGCTCTGTGG	AGGTTGATTTTGTGCCTGGTTG
HX_T34_2	142	TGGGAAAAATTAGAATGGGAGACATC	CACCCTATCCCAGGGACCTTATG
HX_AC23_4	145	GAGCTGCTGAGTAGAAACTGGATGG	ACTGCTTTGGTGATTGCTGCTG
HX_AC22	146	ATGGGGTTGATTGAGGTCCTTG	CATTTTGGTCCCTGGAAGATGC
HX_GT25_4	146	GCAGCCTGGTAATCAGGAAACC	TGATGAGAAAGCCATTGTCCTG
HX_CA24_1	147	ATGGAATCACTGCCACCTCTGG	GCAGTACATCCCGGTTGAGAGG
HX_GA25	147	TTTCCTTCGAGTGCTCCTCCTG	AAAGAAATGTCTTGCTGCTAGGATTG
HX_AC24_4	149	GGCTTCAGGAAGACAGGACAAC	GTGGGACTCAAAGAAATGATATAGCTG
HX_TG23_1	109	TACGTCTCCCCTGCCATCTCTC	CGTTTGAAACCCCTCCCTTACC
HX_GA26	153	AGCCCTATAGCCTTCGCATCTG	TTCTCAGGCCGCGAGTCTAGG
HX_AC29	153	CTCACTTGAGAGGCCCAGAAGG	CTTCCTGAACCCCTTGGGAAAG
HX_AC23_5	156	AGCTTTCCAAGCAAGGTATCATTC	TTCTGGCAGTATATGATGACAAAAGTG
HX_TG22_2	157	CCTTGCCCTCAAATCTTCAGAGAG	TCATTAAGGCCAACATTCTGAGAAAC
HX_AC24_5	158	CAAAGCCTCTGGCCTAAATGAGC	ATGCCTGTGCCACATTTCTGTC
HX_CA24_2	111	TCTCTCTACCTCCAGTCCATCTGTC	GGGCCTCATCTTTTGACCTGAC
HX_CA22_1	159	TGGGATGTGCTGCTTTTATGTC	GGGCAGGTAAGTCAAACATTGC
HX_TG24_5	159	GAGATGTGGTTTTTGGCATCCTG	GAGAGTTCACACAAGCCGTTCAC
HX_TG23_2	160	TGGGAGAATGGAAGCTCATTGG	AACCATCCAGTCAGGAGCAAGG
HX_T30_4	160	CAGAGTCCAGAGTATGTGGGAAAATG	TGTGCCGAGTGGAAGAACAGG
HX_AC24_6	200	ATCTTCCCACGAGTTGGAGCAC	AGCAGCCATAAAAGAGGCAAGC
HX_A36_3	200	AGCCCAATTTTCTGACCTGCAC	AAGGTCTTTCCTGTGCCTTGTTTTC
HX_TG31	201	TCCACCCAGATTGCTGTAACTTTTC	CAGCTCTGTAGAAGGGGTAATATGCAG
HX_A38_3	201	TCCTCTGAGAGCATTGCTGTTTTG	TGGATTAGGGAGGGGTTTGAAG
HX_TG23_3	208	CCACTCTGGTATTGGTGGACTGG	TTGTCCAAATGCCAGATTCACTTC
HX_T35_2	111	GGTTTCACAAAACAGGGATTTATGC	GGGCATTCAGGTAGAGACAATGG
HX_AT25_1	210	CACTATGAAGGCAGAAACCATGC	CAAGGGAAATAGAGGAGTTCTGGAG
HX_AC24_7	211	CTGCCTACTCCTGCCAGGTGAC	CTGTGCAAACTGAGTACCTGCATC
HX_AC23_6	214	GCAGCAACTGAGAGGCAGAATTG	ACAATGAGTTCCAGCCCCAGAG
HX_GT23_2	223	GGTGACAAGGTAAAGGGCACTAGC	GGTAGAAAATGGGGGCAGCATC
HX_AC26	224	TTGCAAGTCCAGAAATGCCTTG	CCCGATTTCCTCTAAAACAGTGTG
HX_A45	111	CAAAGAGCTGCTTCTCAGCTTGC	TGCAAAACATTATTTGTGTCTCACG
HX_CA25_2	225	CAAGAAAGAGGGGCAGATGCAG	CCCCAGGAGAATAAAACCATTCG
HX_A32_3	225	TTGGCCTCAGATGAAAAGCATTC	TCTTATGCACCTCTGCACACCAG
HX_A32_4	229	GAGCTGGATTTGAATCACCTAACG	TGAACAGTTTCTAATAGAGGGGCAAC
HX_AC24_8	230	CTAACTGCCAAGGGAGCTCTGC	GCCGCTGATTGACAGACTATGC
HX_CT27	233	AGGCTTCTTTCTGTGGCTGCTG	TCCCTGTGCCCTCAGGTTATTC
HX_CA24_3	235	TTAAAGATGCCCATACCCTGGTC	CCTTCAAATAAACCAATCACATTGC
HX_TC25_1	239	CGACTGCTTCTTCCATGGTTCC	TTGGGGTAGATGGCTGGGTATG
HX_CA22_2	244	TCACCATTGTCACAGGCTCTGC	GCGAGCTCTCAGCTTTCATCAG
HX_AG27	244	TGTTTCCAAATCAAAGGAATCGTAG	AAAATGTTCACCGTGTAAAGCAAAG
HX_A31_4	245	GGCCTTTTTGTGTCCTGTTTGC	GCAACTCGCCCTTTGGAAGTG
HX_AC23_7	246	TCCATCCTTCTCTTGTCCTACCTTTG	TCAATGCCCTTGTCATTTGGTG
HX_CA25_3	246	CACAATTTTCCCCAGGAGAAGC	TCACCTGGAGGCTTTCATTTTAAG
HX_AT23_2	249	CAGGAAGGAAGAAATTAGATCAAGGAG	TGCATTACTTATACCCTGATGAACTGG
HX_TG23_4	122	TGCAGTATGCACAGGAAGATATTTG	CTTATTCATGAAGTCTCACAAATGCAG
HX_TC25_2	256	CAAGCCCAGCTGGAGTCAGTAG	ACTGCCCTTGCGTGCTTTTATG
HX_TA28	256	ACAAGGATTTGAACCATGTGGAG	AAAGCATTGCTGCCGTTTCTG
HX_TG22_3	258	CTGAGACTGCAATCCCCACTCC	CGCAGCTAACCACTGTCTGAGC
HX_CA26	258	TGTTGGTGTGAAGGAAGCATCG	CCTCTCTCCCAGTTTGCCTTCC
HX_TG26	259	TCCAGCATCTTTTCCTCATGACC	AATGGAGTGATGAGACGGAAACC
HX_AC23_8	260	TGTTGTCAAGTTGAACACGATTGC	TGGGCTTCTTTGGGTGTTTGG
HX_AT24	260	AACAGACGTGACTTAGACAAGGGAAC	GCCAGATTTCTCCTTTTCTTTTTGC
HX_TG27	300	CCCAGCCTAAGATGTGCCAAAC	CGTAAAGACTTTCAGTCATCTTTCACC
HX_A30_2	302	AAATTTTGGGAGAGGGGCTGTG	AGCCATTGTTCGGTCTATTCAGC
HX_AC24_9	303	CACAATGCTAGAAATGGGAAGTTCTG	AACCCAGGAAAAGTGTTGAAAGG
HX_AC23_9	304	CTCGCCCTGAGGACAGAAACTC	CTCCCCATCCTTAACCCGAAAG
HX_AT25_2	305	TCAGGAGCATGACCCAATTGATAC	TGGGAGGCATATGTGCCATTTAG
HX_CT28	307	TCCCTCTTGGGCTCTTTGTCTG	CAGAGAGAAGCGGCTGGAACTG
HX_TG23_5	313	AACATTGAACCTGCCTTTGTGC	TTGAAAATTTGTAAACCCTTCTGATTG
