# Supplementary material for: Comparing Algorithms That Reconstruct Cell Lineage Trees Utilizing Information on Microsatellite Mutations
Source: PLoS Comput Biol. 2013 Nov 14;9(11):e1003297. doi: 10.1371/journal.pcbi.1003297 (PMC3828138; doi:10.1371/journal.pcbi.1003297)
Supplement: Table S6 — Topology comparison simulation results of multiple individuals (S6.1) and single individuals (S6.2). The tables present the results of the comparison between topologies of the inferred trees and the simulated trees, which was done using Penny & Hendy's topological distance algorithm. The top part of the table refers to the simulated trees of topology A, and the other part of the table refers to the simulated trees of topology B (both topologies are presented in Figure S8). For each topology, the simulations performed over three mutation rates (1/100, 1/1000, and 1/10000) and over three amounts of loci (50, 100 and 500). The values presented in the table are the average scores of 1000 simulations. The highest value which can be achieved is 1 (Higher values are better) and it can be seen that none of the methods in any of the scenarios is close to that value. (XLSX) [file pcbi.1003297.s020.xlsx]

## Sheet: S6.1 - Multiple individuals
		50 loci					100 loci					500 loci
Mutation Rate	Score	NJ-ABS	NJ-NormABS	NJ-EqualOrNot	NJ-EUC	NJ-ML	NJ-ABS	NJ-NormABS	NJ-EqualOrNot	NJ-EUC	NJ-ML	NJ-ABS	NJ-NormABS	NJ-EqualOrNot	NJ-EUC	NJ-ML
		Topology A					Topology A					Topology A
1/100	COMP	0.10714	0.10268	0.09821	0.09821	0.11161	0.10714	0.10268	0.09821	0.09821	0.10714	0.11607	0.10714	0.09821	0.09821	0.10714
1/1000	COMP	0.09821	0.10268	0.09375	0.09375	0.10268	0.09821	0.10268	0.09375	0.09821	0.10268	0.10268	0.10714	0.08929	0.09821	0.10714
1/10000	COMP	0.09821	0.09821	0.08929	0.0625	0.09821	0.10268	0.10268	0.08482	0.07143	0.09821	0.09375	0.09821	0.08929	0.08929	0.09375
		Topology B					Topology B					Topology B
1/100	COMP	0.16071	0.16071	0.12054	0.13839	0.16518	0.16071	0.15848	0.125	0.14732	0.16518	0.16964	0.16518	0.14732	0.16071	0.16964
1/1000	COMP	0.15179	0.16518	0.09821	0.09821	0.15625	0.13839	0.15625	0.09375	0.11607	0.14286	0.16518	0.15625	0.09821	0.15402	0.16071
1/10000	COMP	0.13839	0.19196	0.08929	0.07143	0.13839	0.12946	0.17857	0.10268	0.07589	0.125	0.16518	0.17857	0.08929	0.09821	0.16071

## Sheet: S6.2 - Single individual
		50 loci					100 loci					500 loci
Mutation Rate	Score	NJ-ABS	NJ-NormABS	NJ-EqualOrNot	NJ-EUC	NJ-ML	NJ-ABS	NJ-NormABS	NJ-EqualOrNot	NJ-EUC	NJ-ML	NJ-ABS	NJ-NormABS	NJ-EqualOrNot	NJ-EUC	NJ-ML
		Topology A					Topology A					Topology A
1/100	COMP	0.10811	0.10811	0.09459	0.10811	0.12162	0.10811	0.10811	0.09459	0.09459	0.10811	0.10811	0.10811	0.09459	0.09459	0.10811
1/1000	COMP	0.10811	0.10811	0.09459	0.09459	0.09459	0.09459	0.11486	0.09459	0.09459	0.10811	0.10811	0.10811	0.09459	0.09459	0.09459
1/10000	COMP	0.13514	0.11486	0.10811	0.06757	0.11486	0.200894	0.200017	0.4	0.4	0.20025	0.09459	0.09459	0.09459	0.09459	0.09459
		Topology B					0.12162	0.12162	0.09459	0.06757	0.12162	Topology B
1/100	COMP	0.12162	0.10811	0.10811	0.09459	0.12162	0.10811	0.12162	0.10811	0.10811	0.12162	0.10811	0.11486	0.10811	0.09459	0.10811
1/1000	COMP	0.12162	0.10811	0.06757	0.10811	0.12162	0.10811	0.10811	0.06757	0.10811	0.10811	0.10811	0.10811	0.09459	0.12162	0.10811
1/10000	COMP	0.13514	0.13514	0.09459	0.09459	0.13514	0.13514	0.12838	0.07432	0.06757	0.12162	0.09459	0.09459	0.06757	0.09459	0.10811
