# Supplementary material for: Comparing Algorithms That Reconstruct Cell Lineage Trees Utilizing Information on Microsatellite Mutations
Source: PLoS Comput Biol. 2013 Nov 14;9(11):e1003297. doi: 10.1371/journal.pcbi.1003297 (PMC3828138; doi:10.1371/journal.pcbi.1003297)
Supplement: Table S7 — Clustering simulation results of multiple individuals (S7.1) and single individuals (S7.2). The tables present the clustering measures of the lineage tree reconstruction of the simulated trees (described in Methods and Materials). The top part of the table refers to the simulated trees of topology A, and the other part of the table refers to the simulated trees of topology B (both topologies are presented in Figure S8). For each topology, the simulations performed over three mutation rates (1/100, 1/1000, and 1/10000) and over three amounts of loci (50, 100 and 500). The values presented in the table are the average scores of 1000 simulations. Higher values of QLC and lower values of TE and HS are better. The different clustering measures are described in Methods and Materials. (XLSX) [file pcbi.1003297.s021.xlsx]

## Sheet: S7.1 - Multiple individuals
		50 loci					100 loci					500 loci
Mutation Rate	Score	NJ-ABS	NJ-NormABS	NJ-EqualOrNot	NJ-EUC	NJ-ML	NJ-ABS	NJ-NormABS	NJ-EqualOrNot	NJ-EUC	NJ-ML	NJ-ABS	NJ-NormABS	NJ-EqualOrNot	NJ-EUC	NJ-ML
		Topology A					Topology A					Topology A
1/100	QLC	0.68444	0.70274	0.65447	0.66234	0.42409	0.79556	0.8	0.76037	0.76895	0.55212	0.86667	0.81111	0.8	0.8	0.73946
	TE	52.1745	50.0478	69.2408	63.0441	154.19	20.5767	19.9392	35.8573	31.7674	104.301	12.3442	12.3442	26.1949	25.1766	27.9818
	HS	4.27547e-20	7.20527e-23	9.69396e-17	9.34834e-17	3.32415e-11	3.61e-27	3.61e-27	5.2e-18	3.81e-18	2.9e-16	6.21672e-28	6.21672e-28	1.6417e-17	1.6417e-17	3.60971e-27
1/1000	QLC	0.60921	0.62886	0.61794	0.589	0.57381	0.72468	0.75304	0.73784	0.72151	0.70294	0.8	0.86667	0.80444	0.8	0.8
	TE	76.7962	63.3333	93.1587	88.9464	86.18	33.9689	21.5565	40.7933	39.562	38.2586	23.5155	12.3442	23.5155	23.5155	16.8706
	HS	6.46779e-15	6.95939e-17	2.71503e-15	2.80215e-14	4.99661e-14	1.64e-17	1.13e-25	3.81e-18	1.64e-17	1.64e-17	1.6417e-17	6.21672e-28	3.80807e-18	1.6417e-17	1.24334e-27
1/10000	QLC	0.27606	0.32117	0.23561	0.27256	0.30994	0.38774	0.39323	0.40129	0.39825	0.39095	0.72	0.74222	0.72012	0.72457	0.71578
	TE	297.079	181.538	317.746	356.835	192.514	186.28	167.264	205.968	219.18	171.812	46.7301	22.1228	37.9342	43.6784	44.8387
	HS	3.33387e-06	6.03415e-09	3.21588e-05	7.04569e-06	1.40851e-08	1.05e-07	3.34e-08	1.05e-07	1.05e-07	3.8e-08	1.6417e-17	4.27547e-20	3.80815e-18	1.6417e-17	1.6417e-17
		Topology B					Topology B					Topology B
1/100	QLC	0.8	0.73333	0.8	0.79114	0.73333	0.8	0.8	0.8	0.8	0.8	0.8	0.8	0.8	0.8	0.8
	TE	20.0112	20.7921	22.4533	20.7921	20.7921	18.0241	20.7921	20.7921	20.7921	18.6506	18.0241	20.7921	20.7921	18.0241	18.0241
	HS	1.6417e-17	1.6417e-17	1.6417e-17	1.6417e-17	1.6417e-17	1.64e-17	1.64e-17	1.64e-17	1.64e-17	1.64e-17	1.6417e-17	1.6417e-17	1.6417e-17	1.6417e-17	1.6417e-17
1/1000	QLC	0.67148	0.66667	0.69333	0.6779	0.67118	0.75365	0.73333	0.76889	0.76889	0.75111	0.8	0.8	0.8	0.8	0.8
	TE	55.2277	47.1213	52.2368	66.6163	52.6914	40.5836	32.1531	32.2963	38.9224	38.9224	23.5155	20.7921	26.1949	20.7921	20.7921
	HS	2.90221e-16	2.90221e-16	1.6417e-17	3.2834e-17	2.90221e-16	1.64e-17	1.64e-17	1.64e-17	1.64e-17	1.64e-17	1.6417e-17	1.6417e-17	1.6417e-17	1.6417e-17	1.6417e-17
1/10000	QLC	0.47579	0.53646	0.21824	0.37216	0.46225	0.46012	0.51361	0.40987	0.45634	0.44981	0.69778	0.67862	0.73336	0.71556	0.71559
	TE	166.652	62.2874	315.179	338.242	181.991	207.725	81.1915	214.831	258.477	215.917	46.2	33.9689	37.9526	61.2246	48.1767
	HS	7.90774e-11	1.96347e-18	0.333333	3.55888e-05	2.56872e-09	9.68e-09	3.61e-12	2.7e-07	1.79e-08	1.04e-08	3.2834e-17	2.16409e-17	3.80807e-18	1.6417e-17	2.16409e-17

## Sheet: S7.2 - Single individual
		50 loci					100 loci					500 loci
Mutation Rate	Score	NJ-ABS	NJ-NormABS	NJ-EqualOrNot	NJ-EUC	NJ-ML	NJ-ABS	NJ-NormABS	NJ-EqualOrNot	NJ-EUC	NJ-ML	NJ-ABS	NJ-NormABS	NJ-EqualOrNot	NJ-EUC	NJ-ML
		Topology A					Topology A					Topology A
1/100	QLC	0.8	0.82846	0.73681	0.73526	0.66823	0.84169	0.89522	0.80316	0.81333	0.785	0.88	0.92667	0.86667	0.86667	0.90667
	TE	7.68475	6.73746	10.6226	10.1371	12.9939	5.79354	4.26429	7.41852	7.16055	8.82422	4.56621	3.3136	5.21783	5.06876	3.89932
	HS	8.53954e-08	1.34692e-08	5.40373e-06	5.44954e-06	3.58533e-05	7.15168e-07	8.36167e-10	5.40349e-06	5.40349e-06	1.30351e-07	7.15167e-07	8.36017e-10	5.40349e-06	3.72841e-05	8.36124e-10
1/1000	QLC	0.70708	0.79276	0.64222	0.66958	0.69974	0.81625	0.89423	0.74021	0.79407	0.81333	0.88	0.92	0.81417	0.86667	0.88
	TE	12.6621	8.65669	14.5571	13.6673	12.0159	6.41269	4.53561	9.3849	7.93889	6.50559	4.74295	4.05384	7.08811	4.89202	4.56621
	HS	0.000250487	8.71354e-08	0.000235617	0.000237271	0.000237262	1.95111e-05	1.01226e-09	3.72842e-05	5.40349e-06	5.40349e-06	3.05933e-06	9.05684e-09	3.72841e-05	5.40349e-06	5.40349e-06
1/10000	QLC	0.3536	0.44629	0.31558	0.29585	0.33959	0.48025	0.51281	0.45534	0.46259	0.5022	0.76089	0.85333	0.70727	0.76083	0.76083
	TE	31.1037	20.9654	33.5145	38.635	31.4641	25.2478	20.0383	25.3222	28.4987	23.7134	11.1203	5.46471	10.9175	11.9785	11.4663
	HS	0.400254	0.000606384	0.600001	0.400276	0.400532	0.200894	0.200017	0.4	0.4	0.20025	0.2	8.54232e-08	7.25083e-05	0.2	0.2
		Topology B					Topology B					Topology B
1/100	QLC	0.88	0.88	0.89333	0.88	0.89333	0.88	0.88	0.88	0.88	0.89333	0.88	0.88	0.88	0.86667	0.88
	TE	4.14784	4.05384	4.56621	4.24184	3.63941	4.24184	4.24184	4.24184	4.56621	4.05384	4.56621	4.24184	4.65458	4.56621	4.24184
	HS	5.40349e-06	3.05933e-06	7.15167e-07	5.40349e-06	7.15167e-07	5.40349e-06	5.40349e-06	5.40349e-06	5.40349e-06	7.15167e-07	5.40349e-06	5.40349e-06	5.40349e-06	3.72841e-05	5.40349e-06
1/1000	QLC	0.84	0.86667	0.84	0.85333	0.84	0.86667	0.86667	0.86667	0.88	0.86667	0.88	0.88	0.88	0.88	0.88
	TE	7.97628	4.74295	5.69696	5.21927	6.45361	4.56621	4.56621	4.74295	4.56621	4.56621	4.56621	4.56621	4.74295	4.56621	4.56621
	HS	0.2	3.72841e-05	3.72841e-05	3.72841e-05	0.000237262	3.72841e-05	3.72841e-05	3.72841e-05	5.40349e-06	3.72841e-05	5.40349e-06	5.40349e-06	5.40349e-06	5.40349e-06	5.40349e-06
1/10000	QLC	0.64539	0.70574	0.57844	0.59787	0.66393	0.84	0.82711	0.732	0.78667	0.82923	0.85333	0.85333	0.84	0.84	0.85333
	TE	12.2636	9.42047	14.6039	15.1988	12.1693	6.59884	6.37202	8.98634	10.0546	6.98745	5.46424	4.74295	6.38019	9.13977	7.97628
	HS	0.2	0.000216974	0.200267	0.2	0.000425309	5.80377e-06	3.72841e-05	3.73096e-05	3.7293e-05	5.42092e-06	0.000137273	0.000237262	3.72841e-05	0.000237262	0.000237262
