# Supplementary material for: Comparing Algorithms That Reconstruct Cell Lineage Trees Utilizing Information on Microsatellite Mutations
Source: PLoS Comput Biol. 2013 Nov 14;9(11):e1003297. doi: 10.1371/journal.pcbi.1003297 (PMC3828138; doi:10.1371/journal.pcbi.1003297)
Supplement: Table S8 — Depth simulation results. The table presents the results of the depth simulations. The top part of the table refers to simulated trees with relatively low depths of cells (20 and 50 divisions), and the other part of the table refers to the simulated trees with relatively high depths of cells (250 and 300 divisions). For each scenario, the simulations were performed over three mutation rates (1/100, 1/1000, and 1/10000) and over three amounts of loci (50, 100 and 500). The values are the average results of 1000 simulations. The bold values are the best ones over the different distance matrices (lower values of KS and Overlap and higher values of Norm-D are better).The different depth measures are described in Methods and Materials. (XLSX) [file pcbi.1003297.s022.xlsx]

## Sheet: Depth simulations
		50 loci					100 loci					500 loci
Mutation Rate	Score	NJ-ABS	NJ-NormABS	NJ-EqualOrNot	NJ-EUC	NJ-ML	NJ-ABS	NJ-NormABS	NJ-EqualOrNot	NJ-EUC	NJ-ML	NJ-ABS	NJ-NormABS	NJ-EqualOrNot	NJ-EUC	NJ-ML
		Differences between low depths					Differences between low depths					Differences between low depths
1/100	KS (log)	-12.004	-4.06631	-13.6064	-12.004	-12.004	-15.8909	-3.16202	-16.4885	-15.8909	-15.8909	-18.3447	-4.72205	-18.3447	-18.3447	-18.3447
	Norm-D	2.15115	0.75261	2.12494	2.02745	2.16271	2.69567	0.57752	2.5042	2.48525	2.75711	3.60108	0.58836	3.05273	3.27371	3.76641
	Overlap	0.05333	0.27667	0.04333	0.05667	0.05333	0.01333	0.30667	0.01	0.01667	0.01333	0	0.26667	0	0	0
1/1000	KS (log)	-6.16046	-7.7681	-9.54496	-7.35033	-6.16046	-6.16046	-8.63538	-9.54496	-6.94313	-6.16046	-14.1616	-4.38889	-14.1616	-13.6064	-13.6064
	Norm-D	0.96961	1.34542	1.27475	0.99695	0.97482	1.28805	1.62817	1.42694	1.28161	1.27829	2.30715	0.8437	2.10726	2.25062	2.28019
	Overlap	0.16333	0.16	0.11	0.17333	0.165	0.15667	0.14333	0.11333	0.16667	0.15667	0.03333	0.24333	0.03	0.03667	0.03667
1/10000	KS (log)	-2e-05	-15.8909	-9.54496	-2e-05	-2e-05	-0.27067	-11.491	-14.7275	-0.27067	-0.27067	-3.7543	-7.7681	-10.0156	-4.38889	-4.06631
	Norm-D	NaN	4.08187	NaN	NaN	NaN	0.47048	1.27911	0.64905	0.47048	0.47048	0.9527	1.40878	1.22734	0.95421	0.95322
	Overlap	0	0	0	0	0	0.05	0	0.04667	0.05	0.05	0.14667	0.10667	0.10667	0.15333	0.14667
		Differences between high depths					Differences between high depths					Differences between high depths
1/100	KS (log)	-5.785	-1.6399	-5.42011	-5.785	-3.7543	-7.7681	-1.53191	-7.35033	-7.35033	-5.06579	-12.5276	-2.10458	-10.9887	-11.491	-9.54496
	Norm-D	1.29041	0.4688	1.25737	1.24822	0.90537	1.57487	0.41422	1.52815	1.53459	1.143	2.24282	0.44873	2.12407	2.08945	1.82274
	Overlap	0.18	0.36	0.18667	0.18667	0.26333	0.14	0.37667	0.14667	0.14333	0.21333	0.06667	0.36667	0.07333	0.07333	0.10667
1/1000	KS (log)	-4.38889	-2.10458	-4.72205	-4.06631	-4.38889	-6.16046	-1.86684	-6.16046	-5.42011	-6.16046	-10.0156	-2.10458	-10.0156	-10.0156	-10.4969
	Norm-D	1.02135	0.53632	1.09155	1.00271	1.00336	1.26878	0.48327	1.32761	1.26041	1.27325	2.01854	0.491	1.95203	1.89808	1.97032
	Overlap	0.23667	0.34	0.22333	0.23667	0.23667	0.18167	0.35	0.17333	0.19	0.18	0.08667	0.35333	0.08833	0.09333	0.08667
1/10000	KS (log)	-2.10458	-5.06579	-3.7543	-2.35301	-2.10458	-2.35301	-4.38889	-3.16202	-2.61208	-2.35301	-5.06579	-2.61208	-5.785	-5.06579	-5.06579
	Norm-D	0.48795	0.86435	0.63508	0.51517	0.48263	0.62968	0.84536	0.75862	0.6326	0.62235	1.18586	0.61127	1.25187	1.14375	1.16001
	Overlap	0.31667	0.23667	0.28667	0.33333	0.32	0.31	0.255	0.285	0.32	0.31167	0.20667	0.31	0.19	0.21333	0.21
